# Supplementary material for: A highly selective ratio-metric fluorescent sensor for visualizing nitroreductase in hypoxic cells
Source: Royal Society of Chemistry journal article supplement (doi:10.1039/d3cc05063g), 2023-11-22
Supplement: d3cc05063g1.pdf [file d3cc05063g1.pdf]

## Electronic Supplementary Information

### **A highly selective ratio-metric fluorescent sensor for visualizing nitroreductase in hypoxic cells**

Yumei Xu<sup>a\*</sup>, Bing Hu<sup>a</sup>, Yanjun Cui<sup>a</sup>, Li Li<sup>a</sup>, Fang Nian<sup>a</sup>, Zhixia Zhang<sup>a</sup> and Wenting Wang<sup>b</sup>

*a. Institute of Agricultural Resources Chemistry and Application, College of Science, Gansu Agriculture University, No. 1 Yingmen village, Anning District, Lanzhou, Gansu 730070, China.*

*b. College of Life and Health, Wuhan Vocational College of Software and Engineering, Wuhan 430205, China.*

*E-mail: xuyym@gsau.edu.cn*

#### **Contents**

1. Experimental section
  - (1) Reagents and Chemicals
  - (2) Apparatus and Instruments
  - (3) UV/Vis absorption and fluorescence spectroscopic methods
  - (4) Cell culture and confocal microscopic methods
  - (5) MTT assay
  - (6) Synthesis of **NORP**
2. NMR spectra and HR-MS data
3. Time and pH stabilities of probe **NORP**
4. Competition tests of probe **NORP** toward determination of NTR
5. MTT measurements of probe **NORP** in live HeLa cells
6. Confocal microscopy imaging of probe **NORP** in live HeLa cells

## 1. Experimental section

### Reagents and Chemicals

6-nitro-1H,3H-benzo[de]isochromene-1,3-dione, 3-aminopropan-1-ol, triethylamine, tribromophosphane, diethylamino-2-oxo-2H-chromene-3-carboxylic acid, prop-2-yn-1-amine, EDCI, HOBt, Copper sulfate pentahydrate and L-Ascorbic Acid Sodium Salt were purchased from Adamas-Beta Co., Ltd. (Shanghai, China). Petroleum ether (PE), ethyl acetate (EA), dichloromethane (DCM), ethanol (EtOH) and N, N-dimethylformamide (DMF) were bought from General Reagents Co., Ltd. (Shanghai, China). KCl, MgCl<sub>2</sub>·6H<sub>2</sub>O, CaCl<sub>2</sub>, trypsin, bovine serum albumin (BSA), ascorbic Acid (AA) and dopamine (DA) were purchased from Aladdin Chemistry Co. Ltd. (China). Phosphate buffer solution (PBS, pH 7.4) with concentration of 0.1 M was prepared from KH<sub>2</sub>PO<sub>4</sub>, K<sub>2</sub>HPO<sub>4</sub>·3H<sub>2</sub>O and KCl. All aqueous solutions were prepared with Milli-Q water (18.2 M Ω cm, Millipore) and all chemicals were used as purchase without further purification.

### Apparatus and Instruments

<sup>1</sup>H NMR and <sup>13</sup>C NMR spectra were obtained with a 500 MHz NMR spectrometer (Bruker, Germany). HPLC-MS was performed on Agilent 1260 HPLC (U.S.A.) equipped with SolariX 7.0T FT ICR MS (Bruker, Germany).

### UV/Vis absorption and fluorescence spectroscopic methods

All UV/Vis absorption and fluorescence spectra were recorded on UV-2600 (Shimadzu Corporation, Kyoto, Kyoto Prefecture, Japan) and RF-6000 (Shimadzu Corporation, Kyoto, Kyoto Prefecture, Japan) spectrophotometer, respectively. Stock solutions of compounds were prepared in DMSO (HPLC grade). All data were recorded in PBS solution (10 mM, pH 7.4) containing 5%(v/v) of DMSO. Excitation wavelength was 405 nm.

### Cell culture and confocal microscopic methods

A human cervical cancer cells (HeLa) were cultured in Dulbecco's modified Eagle's medium (DMEM) supplemented with 10% Gibco® fetal bovine serum (FBS), and 100 U/mL penicillin-streptomycin. Adenocarcinoma human alveolar basal epithelial cells (A549) and human hepatocellular liver carcinoma cells (HepG2) were cultured Roswell Park Memorial Institute (RPMI) 1640 Medium supplemented with 10% FBS, and 100 U/mL penicillin-streptomycin. Mouse embryonic fibroblast cells (NIH-3T3) were cultured in DMEM supplemented with 10% Gibco® bovine calf serum (BCS), and 100 U/mL penicillin-streptomycin. At 2 days before the microscopic experiments, the cells were transferred on cover glass-bottom dish. The cells were seeded at 10<sup>5</sup> per dish and maintained at 37 °C in a humidified atmosphere consisting of 5% (v/v) CO<sub>2</sub> containing air.

### MTT assay

Cell viability was assessed by MTT (3-(4,5-dimethylthiazol-2-yl)-2,5-diphenyltetrazolium bromide)

assay. Cells at  $1.5 \times 10^4$ /mL were treated with different concentrations of probe 1 in 96-well plates for 24 h at 37 °C. Then, a solution of MTT in serum free media (5 mg/mL) was added to each well, which was then further incubated for 3 h. The water-insoluble formazan was formed during the incubation, and then DMSO was added to each well. The amount of formazan was then measured by checking the absorbance at 540 nm using a Spectra Max i3x microplate reader (Molecular devices, San Jose, CA). MTT was purchased from Sigma-Aldrich (St. Louis, MO) and used as received without further purification.

### Synthesis of NORP

**Synthesis of compound 1.** A mixture of 6-nitro-1H,3H-benzo[de]isochromene-1,3-dione (486 mg, 2.0 mmol), 3-aminopropan-1-ol (750 mg, 10 mmol), and triethylamine (NEt<sub>3</sub>) (505 mg, 5 mmol) in ethanol (EtOH) (20 mL) was stirred for and refluxed for 8 h under N<sub>2</sub>. The mixture was cooled, filtered, then removed the solvent by evaporation and dried in vacuo. The residue was purified by column chromatography (DCM: EtOH = 200: 1, v/v) to obtain **compound 1**. <sup>1</sup>H NMR (500 MHz, DMSO-*d*<sub>6</sub>) δ 8.63 (d, J = 8.7 Hz, 1H), 8.59 – 8.45 (m, 3H), 8.03 (t, J = 8.0 Hz, 1H), 4.09 (t, J = 7.5 Hz, 2H), 3.52 (t, J = 6.4 Hz, 2H), 1.81 (t, J = 7.1 Hz, 2H). <sup>13</sup>C NMR (126 MHz, DMSO-*d*<sub>6</sub>) δ 163.28, 162.48, 149.37, 132.02, 130.48, 129.93, 129.05, 128.61, 126.98, 124.66, 123.09, 123.06, 59.31, 38.44, 31.20, 31.15.

**Synthesis of compound 2.** A mixture of **compound 1** (300 mg, 1.0 mmol), tribromophosphane (540 mg, 2.0 mmol) in DCM was stirred for 2h under N<sub>2</sub> at room temperature. Then, the mixture was washed three times with water (20 mL). The organic layer was separated and dried over anhydrous Na<sub>2</sub>SO<sub>4</sub>. The solvent was removed by evaporation under reduced pressure, the residue was purified by column chromatography (DCM: EtOH = 500:1 to 100:1, v/v) to obtain **compound 2**. <sup>1</sup>H NMR (600 MHz, DMSO-*d*<sub>6</sub>) δ 8.69 (d, J = 8.3 Hz, 1H), 8.63 – 8.58 (m, 2H), 8.54 (d, J = 8.8 Hz, 1H), 8.11 – 8.06 (m, 1H), 4.20 – 4.15 (m, 2H), 3.66 – 3.61 (m, 2H), 2.25 – 2.20 (m, 2H). <sup>13</sup>C NMR (125 MHz, DMSO-*d*<sub>6</sub>) δ 163.59, 162.80, 149.53, 132.06, 130.52, 129.96, 129.14, 128.86, 127.22, 124.66, 123.33, 123.14, 40.49, 32.74, 31.23.

**Synthesis of compound 2-1.** A mixture of **compound 2** (363 mg, 1.0 mmol), sodium azide (195 mg, 3.0 mmol) in N, N-dimethylformamide (DMF) (10 mL) was stirring overnight at 90 °C under N<sub>2</sub>. Cool the mixture to room temperature and remove the solvent by reduced pressure distillation. The mixture was diluted with dichloromethane (20 mL), and washed three times with water (20 mL). The organic layer was separated and dried over anhydrous Na<sub>2</sub>SO<sub>4</sub>. The solvent was removed by evaporation under reduced pressure to obtain **compound 2-1**.

**Synthesis of compound 3.** A mixture of 7-(diethylamino)-2-oxo-2H-chromene-3-carboxylic acid (261 mg, 1.0 mmol), prop-2-yn-1-amine (220 mg, 4.0 mmol), 1-ethyl-3-(3-(dimethylamino)propyl)carbodiimide (EDCI) (0.37 g, 1.9 mmol), and 1-hydroxybenzotriazole hydrate (HOBt) (0.29 g, 2.4 mmol), triethylamine (NEt<sub>3</sub>) (303 mg, 3 mmol) in N,N-dimethylformamide (DMF) (10 mL) was stirring overnight under N<sub>2</sub> at room temperature. The mixture was diluted with dichloromethane (20 mL), and washed three times with water (20 mL). The organic layer was separated and dried over anhydrous Na<sub>2</sub>SO<sub>4</sub>. The solvent was removed by evaporation under reduced pressure, the residue was purified by column chromatography (DCM: EtOH = 200:1 to 20:1, v/v) to obtain **compound 3**. <sup>1</sup>H NMR (500 MHz, DMSO-*d*<sub>6</sub>) δ 8.84 (t, J = 5.6 Hz, 1H), 8.67 (s, 1H), 7.69 (d, J = 9.0 Hz, 1H), 6.81 (dd, J = 9.0, 2.5 Hz, 1H), 6.61 (d, J = 2.4 Hz, 1H), 4.10 (dd, J = 5.6, 2.5 Hz, 2H), 3.48 (q, J = 7.1 Hz, 4H), 3.14 (t, J = 2.5 Hz, 1H), 1.14 (t, J = 7.0 Hz, 6H). <sup>13</sup>C NMR (125 MHz, DMSO-*d*<sub>6</sub>) δ 162.53, 162.09, 157.79, 153.05, 148.52, 132.17, 110.66, 109.24, 108.11, 96.34, 81.53, 73.59, 44.82, 28.91, 12.78.

**Synthesis of compound NORP.** A mixture of **compound 3** (163 mg, 0.5 mmol), **compound 4** (150 mg, 0.5 mmol), Copper sulfate pentahydrate (150 mg, 0.6 mmol) and L-Ascorbic Acid Sodium Salt (240 mg, 1.4 mmol) in anhydrous N, N-dimethylformamide (DMF) (10 mL) was stirring overnight under N<sub>2</sub> at 100 °C. Cool the mixture to room temperature and remove the solvent by reduced pressure distillation. Then, the reaction mixture was concentrated under vacuum, and the crude product was purified by silica column chromatography (DCM: MeOH=100:1, v/v) to obtain Compound **NORP**. <sup>1</sup>H NMR (500 MHz, DMSO-*d*<sub>6</sub>) δ 8.68 (s, 1H), 8.61 (d, J = 8.3 Hz, 1H), 8.42 (d, J = 7.2 Hz, 1H), 8.19 (d, J = 8.4 Hz, 1H), 8.06 (s, 1H), 7.68 (d, J = 9.0 Hz, 1H), 7.64 (t, J = 7.9 Hz, 1H), 6.84 (d, J = 8.4 Hz, 1H), 6.80 (dd, J = 9.0, 2.5 Hz, 1H), 6.61 (d, J = 2.3 Hz, 1H), 4.54 (s, 2H), 4.42 (t, J = 7.2 Hz, 2H), 4.07 (t, J = 7.0 Hz, 2H), 3.50 (d, J = 7.1 Hz, 2H), 3.47 (d, J = 7.0 Hz, 2H), 2.19 – 2.15 (m, 2H), 1.14 (t, J = 7.0 Hz, 6H). <sup>13</sup>C NMR (125 MHz, DMSO-*d*<sub>6</sub>) δ 164.34, 163.43, 162.69, 162.14, 157.66, 152.89, 148.24, 134.39, 132.00, 131.43, 130.16, 129.73, 124.34, 122.15, 110.53, 109.53, 108.58, 108.05, 107.94, 96.24, 55.33, 48.21, 44.79, 37.27, 14.38, 12.73. HR-EI-MS Calcd for: C<sub>32</sub>H<sub>30</sub>N<sub>7</sub>O<sub>7</sub><sup>+</sup> ([M+H]<sup>+</sup>): 624.2207; Found: 624.2202.

## 2. NMR spectra and HR-MS data

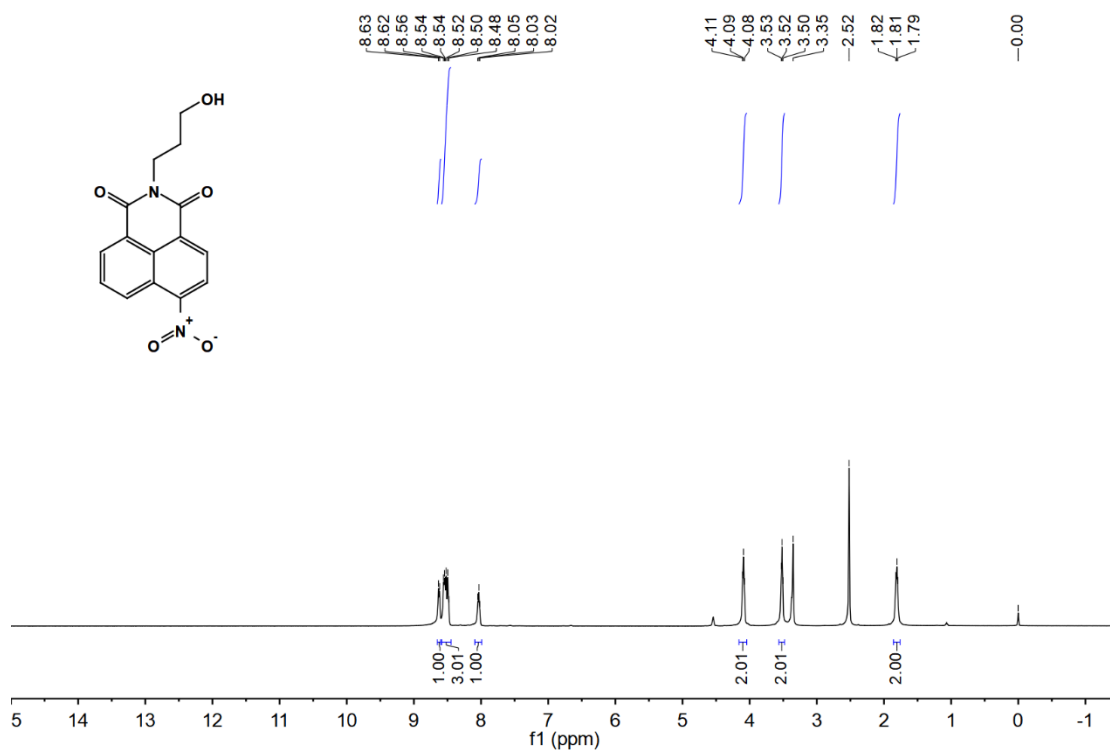

Fig. S1. <sup>1</sup>H NMR spectrum of Compound 1.

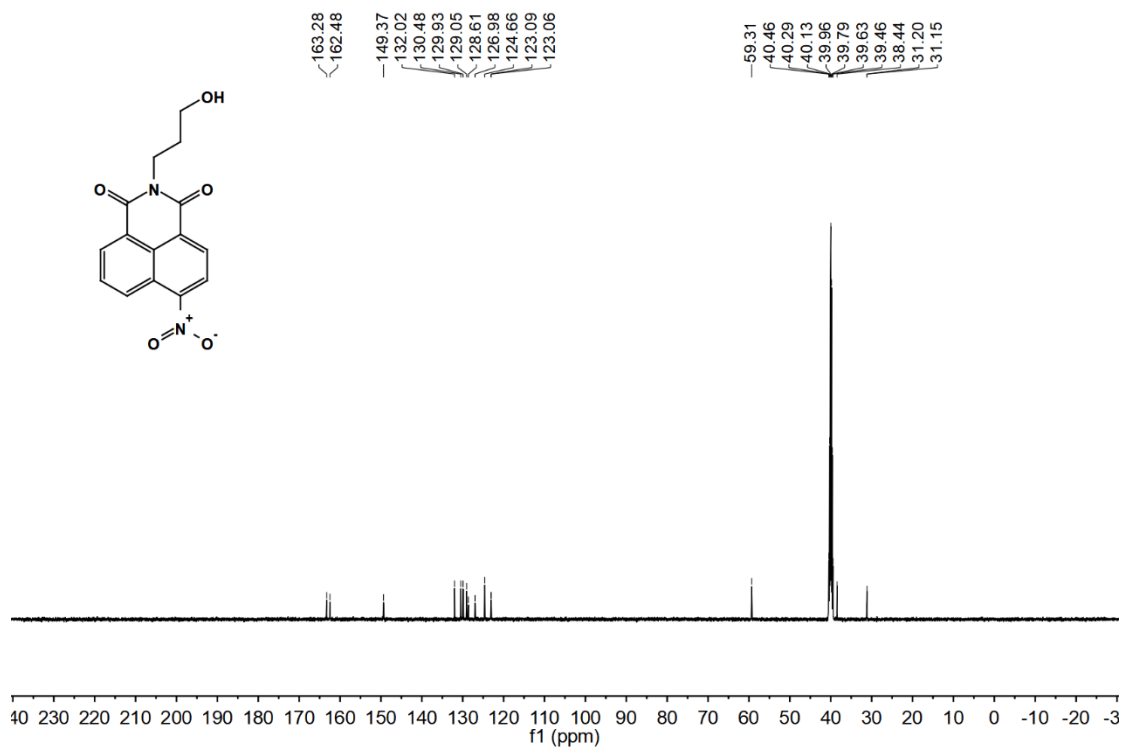

Fig. S2. <sup>13</sup>C NMR spectrum of Compound 1.

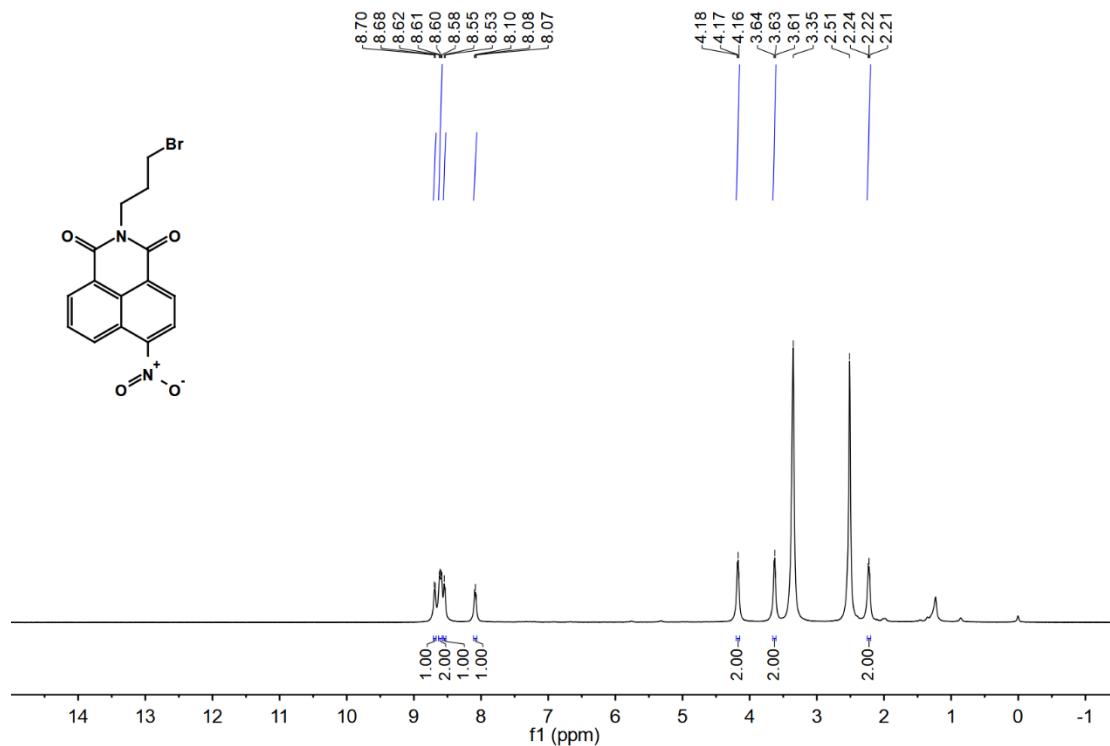

**Fig. S3.** <sup>1</sup>H NMR spectrum of Compound 2.

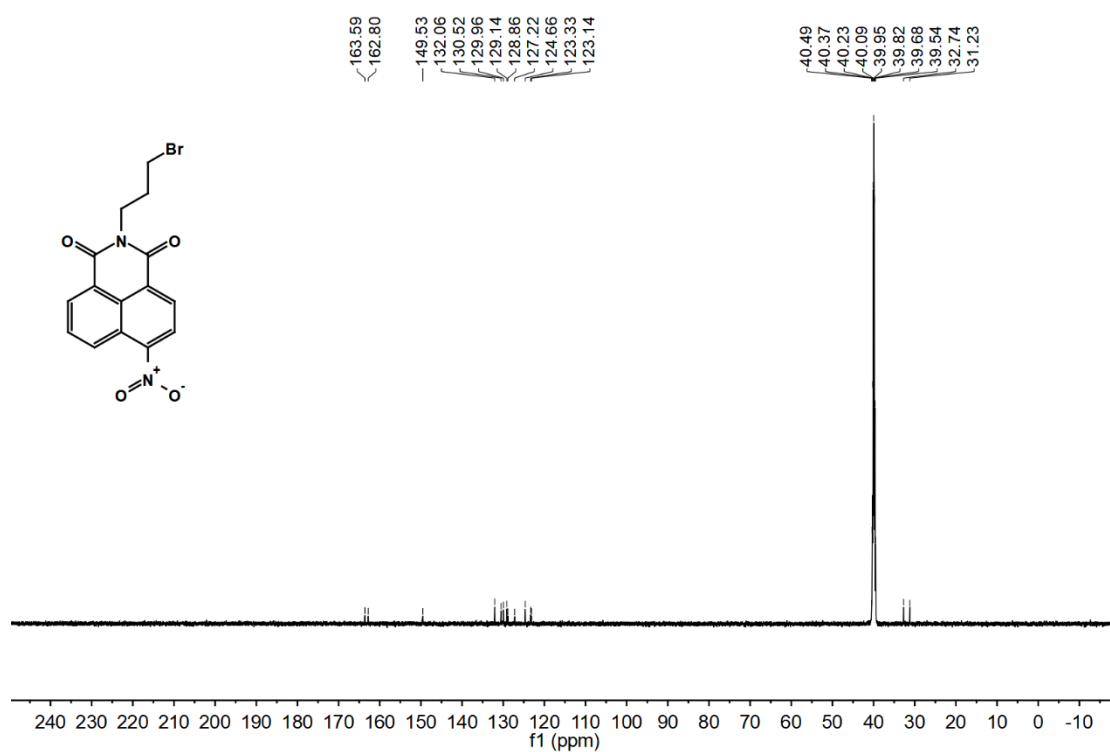

**Fig. S4.** <sup>13</sup>C NMR spectrum of Compound 2.

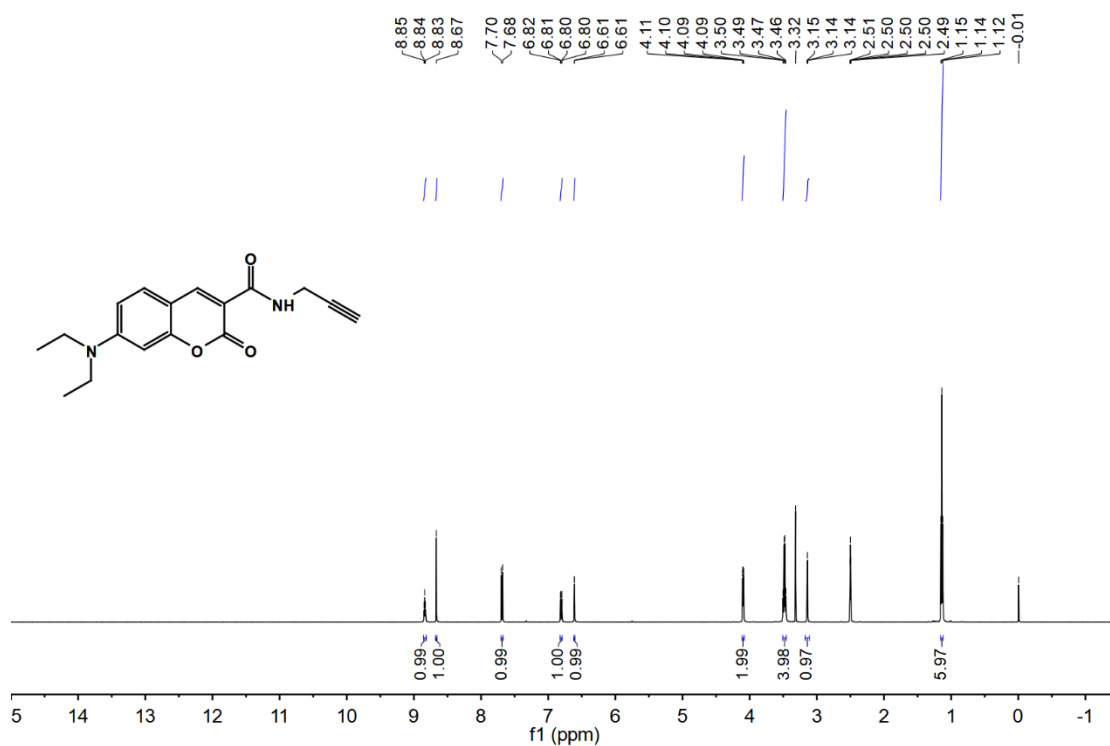

Fig. S5. <sup>1</sup>H NMR spectrum of Compound 3.

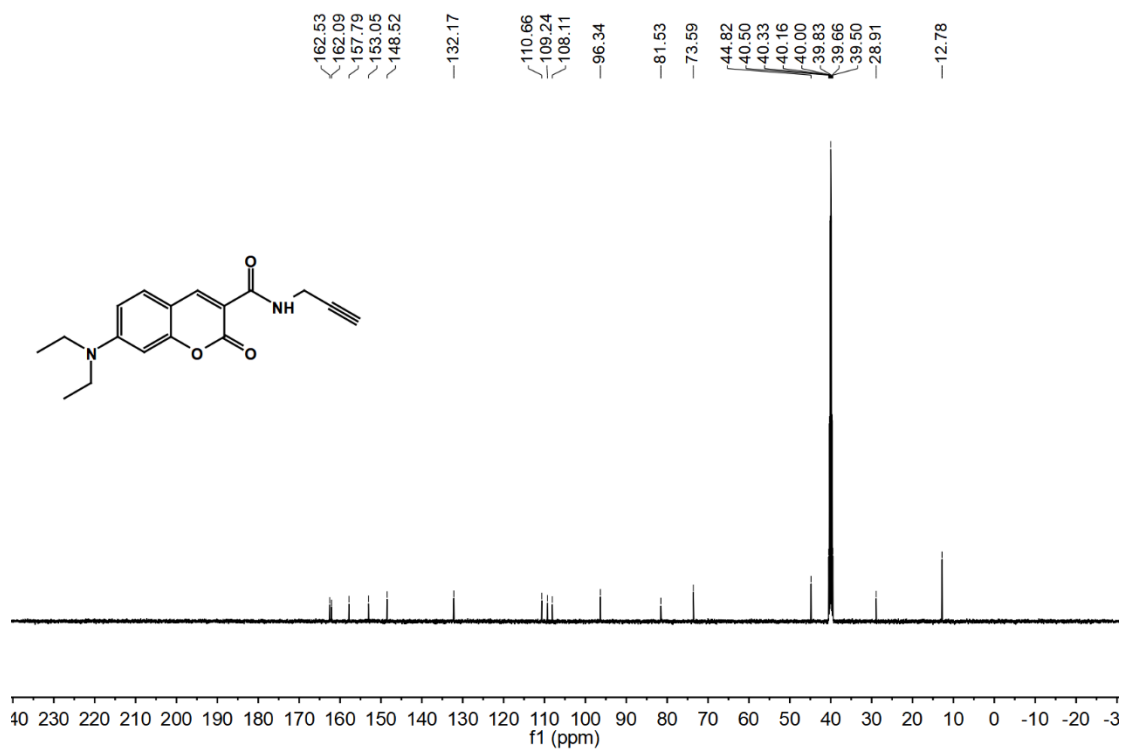

Fig. S6. <sup>13</sup>C NMR spectrum of Compound 3.

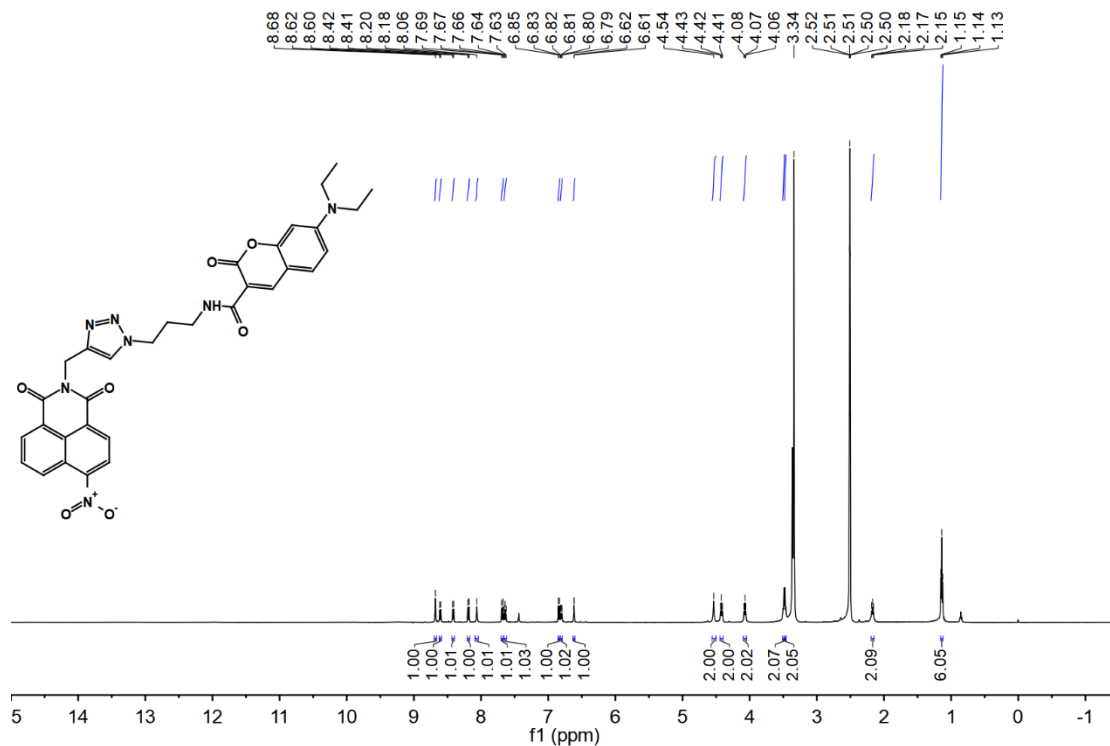

**Fig. S7.** <sup>1</sup>H NMR spectrum of Compound NORP.

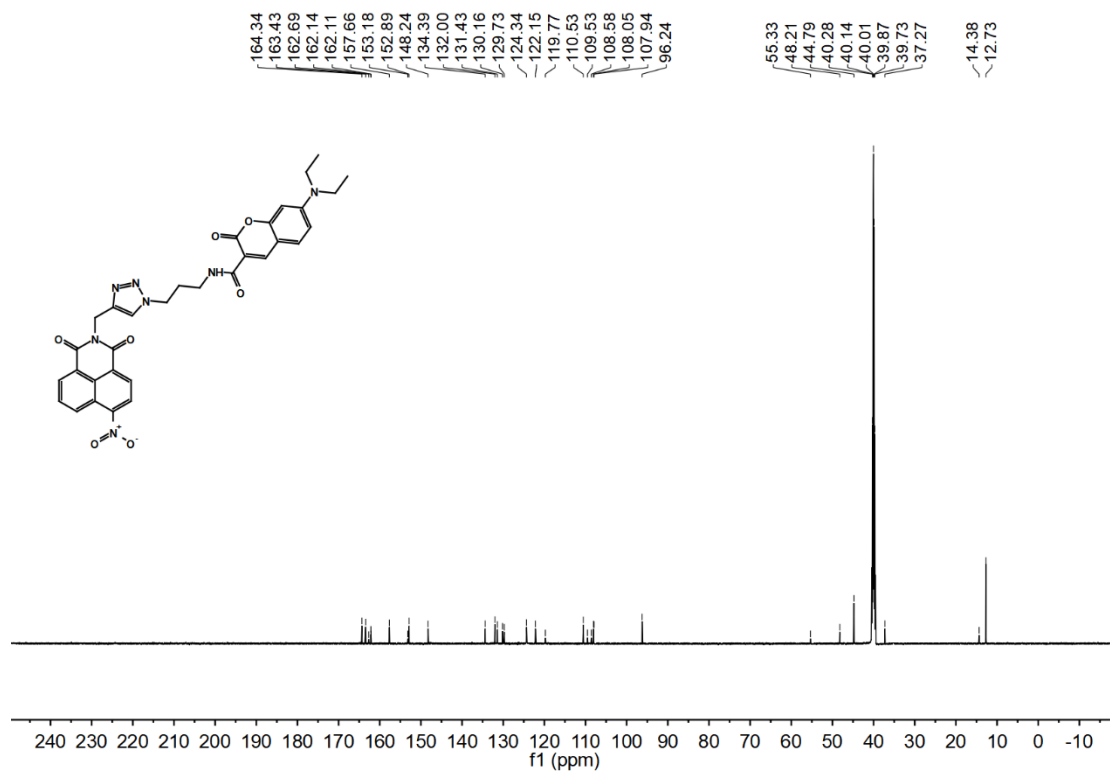

**Fig. S8.** <sup>13</sup>C NMR spectrum of Compound NORP.



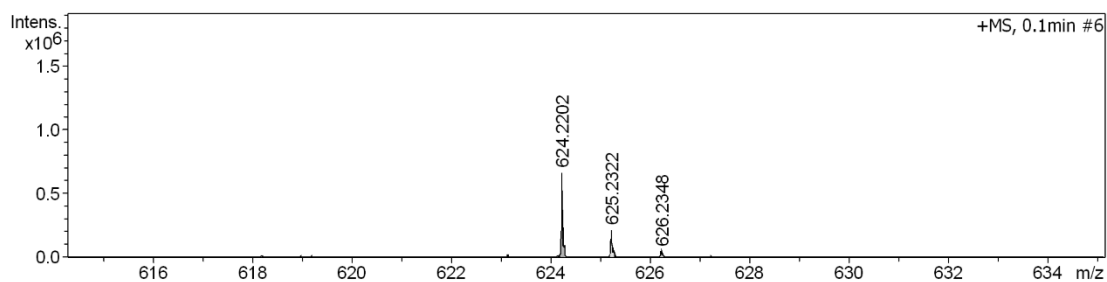

**Fig. S9.** HR-MS spectrum of Compound NORP.

### 3. Time and pH stabilities of probe NORP

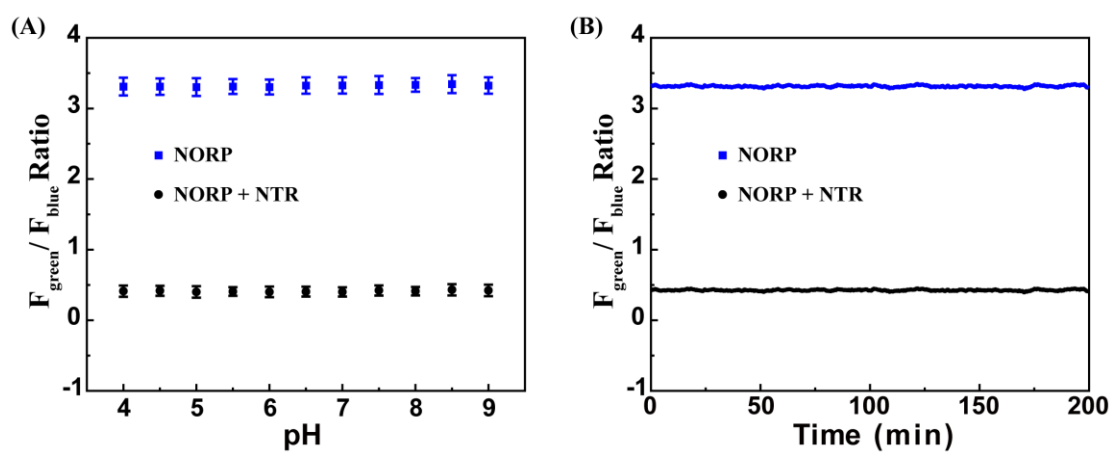

**Fig. S10.** (c) Time and (d) pH stabilities of probe NORP (5  $\mu\text{M}$ ) with (red curve) and without (black curve) NTR (10.0  $\mu\text{g mL}^{-1}$ ) (error bars,  $n = 5$ , S.D.).

#### 4. Competition tests of probe NORP toward determination of NTR

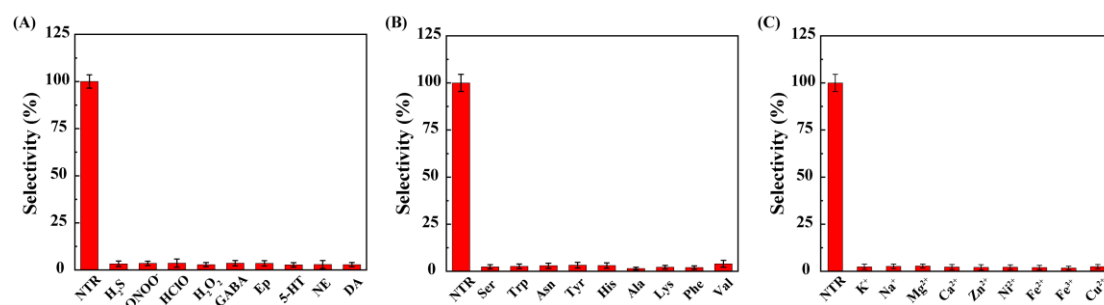

**Fig. S11.** Competition tests of 5.0  $\mu\text{M}$  probe NORP toward NTR followed by addition of (A) ROS and other relative analyts (1.0 mM for each); (B) amino acids (1.0 mM for each); (C) metal ions (1.0 mM for each). (error bars,  $n = 5$ , S.D.).

#### 5. MTT measurements of probe NORP in live HeLa cells

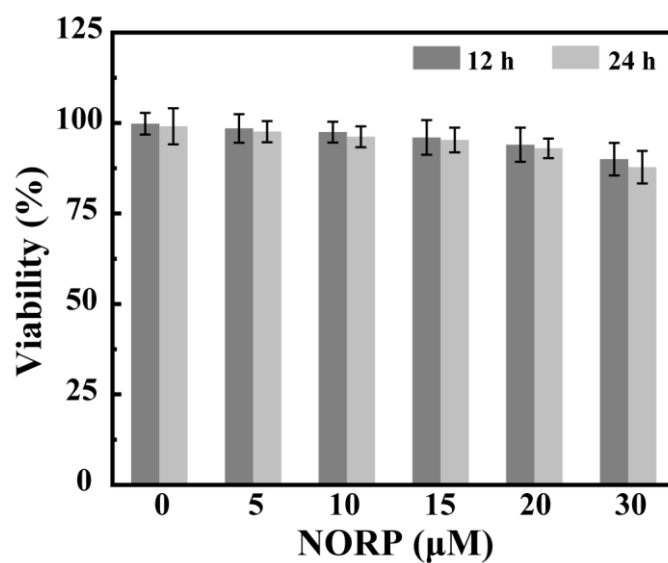

**Fig. S12.** The MTT assay for HeLa cells upon incubation with NORP at different concentrations (0, 5, 10, 15, 20, 25 and 30  $\mu\text{M}$ ) after 12 h and 24 h, respectively (error bars,  $n = 5$ , S.D.).

## 6. Confocal microscopy imaging of probe NORP in live HeLa cells

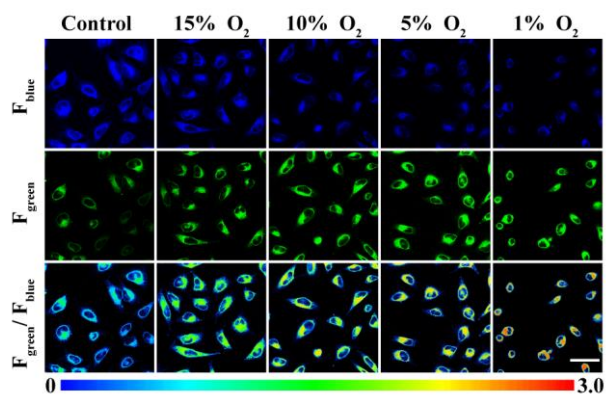

**Fig. S13.** Confocal microscopy imaging of NORP (5  $\mu$ M) in HeLa cells under different O<sub>2</sub> concentrations (20%, 10%, 5%, 1%). Scale bar: 30  $\mu$ m.

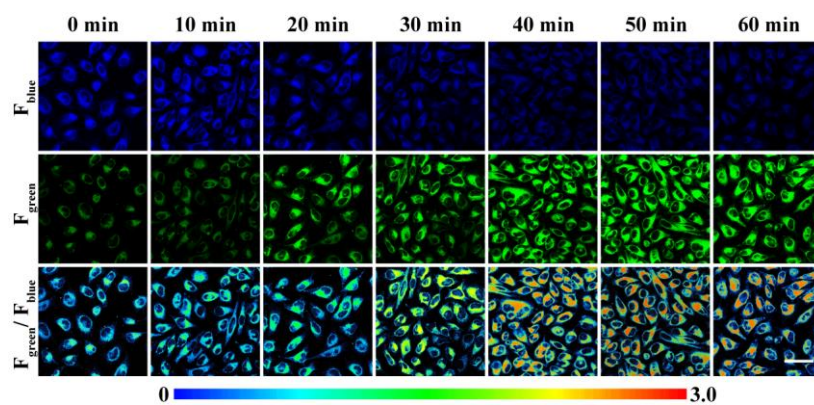

**Fig. S14.** Confocal microscopy imaging of probe NORP (5  $\mu$ M) in HeLa cells under hypoxia stimulation (1% O<sub>2</sub>) for different times (0, 10, 20, 30, 40, 50 and 60 min). Scale bar: 30  $\mu$ m.
